# Supplementary material for: Biomechanical Properties of the Aortic Wall: Changes during Vascular Calcification
Source: MDPI journal article supplement (doi:10.3390/biomedicines11010211), 2023-01-14
Supplement: s1 [file s1]

## Supplementary Material

### *Biomechanical properties of the thoracic aortic wall: effect of location*

**Suppl. Table S1. Biomechanical properties basal (0 days).** n=3 rats, each thoracic aorta into 18 rings.

| Parameter                    | df1 | df2 | F      | p      | eta <sup>2</sup> | d <sup>†</sup> |
|------------------------------|-----|-----|--------|--------|------------------|----------------|
| E <sub>low</sub>             | 17  | 34  | 0.9112 | 0.5679 | 0.3130           | 1.34           |
| E <sub>high</sub>            | 17  | 34  | 0.4810 | 0.9448 | 0.1939           | 0.98           |
| AUC                          | 17  | 34  | 0.7120 | 0.7695 | 0.2625           | 1.20           |
| Breaking point ( $\sigma$ )  | 17  | 34  | 0.4203 | 0.9699 | 0.1736           | 0.92           |
| Breaking point ( $\lambda$ ) | 17  | 34  | 0.6248 | 0.8483 | 0.2380           | 1.12           |
| Calcium content( $\mu$ g/mg) | 17  | 34  | 1.0841 | 0.4059 | 0.3515           | 1.48           |

<sup>†</sup> d was calculated for better comparison with parameters in Table 3.

df1: count freedoms, df2: denominator freedoms, F: F test p: p value, eta<sup>2</sup>: effect size, d: Cohen's effect size

**Suppl. Table S2. Biomechanical properties upon 14 days of treatment with CAM.**

| Parameter                    | df1 | df2 | F      | p      | eta <sup>2</sup> | d <sup>†</sup> |
|------------------------------|-----|-----|--------|--------|------------------|----------------|
| E <sub>low</sub>             | 17  | 34  | 0.5736 | 0.8882 | 0.2229           | 1.08           |
| E <sub>high</sub>            | 17  | 34  | 0.8865 | 0.5929 | 0.3071           | 1.34           |
| AUC                          | 17  | 34  | 0.8313 | 0.6494 | 0.2936           | 1.28           |
| Breaking point ( $\sigma$ )  | 17  | 34  | 0.5911 | 0.8752 | 0.2281           | 1.08           |
| Breaking point ( $\lambda$ ) | 17  | 34  | 0.6556 | 0.8217 | 0.2469           | 1.14           |
| Calcium content( $\mu$ g/mg) | 17  | 34  | 0.9777 | 0.5025 | 0.3283           | 1.40           |

<sup>†</sup> d was calculated for better comparison with parameters in Table 3.

CAM: calcifying medium, df1: count freedoms, df2: denominator freedoms, F: F test p: p value, eta<sup>2</sup>: effect size, d: Cohen's effect size

### *Method validation by a known inductor of vascular calcification: azathioprine*

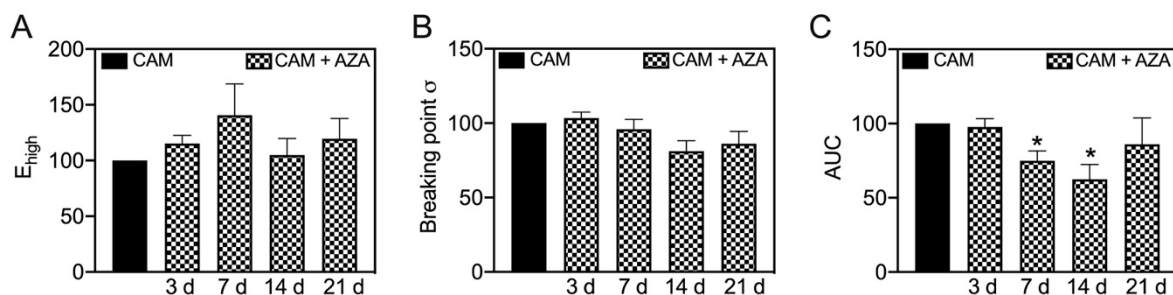

**Suppl. Figure S1. Effect of azathioprine on biomechanical properties under calcifying conditions.**

Aortic tissue rings were incubated for indicated time-points with calcifying medium (CAM) and azathioprine (100  $\mu$ mol/l) and the stress-stretch curve and respective parameters were determined. Values are normalized to CAM stimulation at respective time-point. n=6, \*p<0.05 compared to CAM at respective time-points. This Figure corresponds to Figure 7 of the main article.
